# Supplementary material for: A New Acidity-Based Approach for Estimating Total Dissolved Solids in Acidic Mining Influenced Water
Source: MDPI journal article supplement (doi:10.3390/w15162995), 2023-08-19
Supplement: s1 [file s1]

## Supplementary Materials

**Table S1.** Physical-chemical parameters measured for the 121 mine-influenced waters, with the respective class and conversion factor ( $f$ ) defined according to the HCA. EC – Electrical Conductivity; TDS – Gra = Total Dissolved Solids analyzed by gravimetry; TDS – est = Total Dissolved Solids estimated from EC; TDS\_Ac - Total Dissolved Solids estimated from Acidity

| Sampling Location | Sample reference | pH   | TDS_est<br>(mg L <sup>-1</sup> ) | TDS_Ac<br>(mg L <sup>-1</sup> ) | TDS_Gra<br>(mg L <sup>-1</sup> ) | EC<br>( $\mu$ S cm <sup>-1</sup> ) | Sulfates<br>(mg L <sup>-1</sup> ) | Acidity<br>(mg L <sup>-1</sup> of CaCO <sub>3</sub> ) | Class and $f_{\text{median}}$                             |
|-------------------|------------------|------|----------------------------------|---------------------------------|----------------------------------|------------------------------------|-----------------------------------|-------------------------------------------------------|-----------------------------------------------------------|
| Valdarcas mine    | V7_05/19         | 3.11 | 303.0                            | 332.5                           | 338.1                            | 568.5                              | 203.8                             | 133.0                                                 | Orange class – very<br>low contaminated<br>MIW<br>$f=2.5$ |
| Valdarcas mine    | V7_06/19         | 3.19 | 305.0                            | 335.0                           | 353.5                            | 575.0                              | 198.3                             | 134.0                                                 |                                                           |
| Valdarcas mine    | V7_11/18         | 3.41 | 293.8                            | 390.0                           | 295.8                            | 581.1                              | 210.7                             | 156.0                                                 |                                                           |
| Valdarcas mine    | V7_01/19         | 3.32 | 632.6                            | 407.5                           | 307.4                            | 559.0                              | 152.7                             | 163.0                                                 |                                                           |
| Valdarcas mine    | V7_09/19         | 3.27 | 276.0                            | 350.0                           | 298.6                            | 493.2                              | 196.1                             | 140.0                                                 |                                                           |
| Valdarcas mine    | V7_07/19         | 3.39 | 284.0                            | 315.0                           | 321.1                            | 512.9                              | 196.1                             | 126.0                                                 |                                                           |
| Valdarcas mine    | V7_08/19         | 3.18 | 284.0                            | 320.0                           | 381.1                            | 535.3                              | 209.7                             | 128.0                                                 |                                                           |
| Valdarcas mine    | V6_12/18         | 3.10 | 371.8                            | 430.0                           | 390.8                            | 531.0                              | 245.8                             | 172.0                                                 |                                                           |
| Valdarcas mine    | V7_04/19         | 3.19 | 336.0                            | 372.5                           | 440.3                            | 638.5                              | 211.8                             | 149.0                                                 |                                                           |
| Valdarcas mine    | V7_02/19         | 3.43 | 314.0                            | 432.5                           | 403.6                            | 635.5                              | 213.3                             | 173.0                                                 |                                                           |
| Valdarcas mine    | V7_03/19         | 3.35 | 325.0                            | 370.0                           | 334.7                            | 611.6                              | 221.2                             | 148.0                                                 |                                                           |
| Valdarcas mine    | V7_10/18         | 3.41 | 303.0                            | 307.5                           | 459.7                            | 415.0                              | 217.2                             | 123.0                                                 |                                                           |
| Valdarcas mine    | V7_12/18         | 3.34 | 292.9                            | 362.5                           | 354.7                            | 412.0                              | 201.8                             | 145.0                                                 |                                                           |
| São Domingos mine | PAT_6_10/18      | 4.09 | 405.2                            | 240.0                           | 510.0                            | 872.0                              | 247.3                             | 96.0                                                  |                                                           |

**Table S1.** Physical-chemical parameters measured for the 121 mine-influenced waters, with the respective class and conversion factor ( $f$ ) defined according to the HCA. EC – Electrical Conductivity; TDS – Gra = Total Dissolved Solids analyzed by gravimetry; TDS – est = Total Dissolved Solids estimated from EC; TDS\_Ac - Total Dissolved Solids estimated from Acidity. (continue)

| Sampling Location | Sample reference | pH   | TDS_est<br>(mg L <sup>-1</sup> ) | TDS_Ac<br>(mg L <sup>-1</sup> ) | TDS_Gra<br>(mg L <sup>-1</sup> ) | EC<br>( $\mu$ S cm <sup>-1</sup> ) | Sulfates<br>(mg L <sup>-1</sup> ) | Acidity<br>(mg L <sup>-1</sup> of CaCO <sub>3</sub> ) | Class and $f_{\text{median}}$                    |
|-------------------|------------------|------|----------------------------------|---------------------------------|----------------------------------|------------------------------------|-----------------------------------|-------------------------------------------------------|--------------------------------------------------|
| Valdarcas mine    | V6_02/19         | 3.19 | 704.0                            | 1134.0                          | 1166.7                           | 1448.0                             | 675.8                             | 420.0                                                 | Green class –low<br>contaminated MIW<br>$f= 2.7$ |
| Valdarcas mine    | V9_10/18         | 2.72 | 758.3                            | 1080.0                          | 1258.3                           | 1411.0                             | 731.0                             | 400.0                                                 |                                                  |
| Valdarcas mine    | V4_12/18         | 3.03 | 667.6                            | 1417.5                          | 953.3                            | 1565.0                             | 589.4                             | 525.0                                                 |                                                  |
| Valdarcas mine    | V3_12/18         | 2.86 | 729.5                            | 1125.9                          | 1015.6                           | 1302.0                             | 627.0                             | 417.0                                                 |                                                  |
| Valdarcas mine    | V6_01/19         | 3.17 | 628.7                            | 1026.0                          | 1043.9                           | 1242.0                             | 638.9                             | 380.0                                                 |                                                  |
| Valdarcas mine    | V9_07/19         | 2.98 | 714.0                            | 985.5                           | 1091.1                           | 1414.0                             | 593.4                             | 365.0                                                 |                                                  |
| Valdarcas mine    | V9_08/19         | 3.84 | 725.0                            | 1028.7                          | 1145.3                           | 1423.0                             | 619.2                             | 381.0                                                 |                                                  |
| Valdarcas mine    | V9_06/19         | 2.91 | 691.0                            | 950.4                           | 792.8                            | 1419.0                             | 563.9                             | 352.0                                                 |                                                  |
| Valdarcas mine    | V9_04/19         | 2.89 | 688.0                            | 931.5                           | 945.6                            | 1398.0                             | 572.7                             | 345.0                                                 |                                                  |
| Valdarcas mine    | V9_05/19         | 3.00 | 681.0                            | 904.5                           | 1023.9                           | 1371.0                             | 545.2                             | 335.0                                                 |                                                  |
| Valdarcas mine    | V9_09/19         | 2.97 | 698.0                            | 1077.3                          | 1031.4                           | 1388.0                             | 552.9                             | 399.0                                                 |                                                  |
| Valdarcas mine    | V9_12/18         | 2.85 | 656.3                            | 947.7                           | 760.3                            | 1117.0                             | 478.3                             | 351.0                                                 |                                                  |
| Valdarcas mine    | V9_03/19         | 2.99 | 688.0                            | 777.6                           | 676.7                            | 1151.0                             | 516.5                             | 288.0                                                 |                                                  |
| Valdarcas mine    | V9_11/18         | 2.92 | 678.5                            | 1069.2                          | 879.9                            | 1173.0                             | 526.5                             | 396.0                                                 |                                                  |
| Valdarcas mine    | V9_02/19         | 3.19 | 647.0                            | 893.7                           | 814.4                            | 1247.0                             | 489.4                             | 331.0                                                 |                                                  |
| Valdarcas mine    | V9_01/19         | 3.17 | 666.3                            | 993.6                           | 962.2                            | 1266.0                             | 516.3                             | 368.0                                                 |                                                  |
| São Domingos mine | PAT_6_02/19      | 3.00 | 551.0                            | 793.8                           | 703.9                            | 1298.0                             | 426.5                             | 294.0                                                 |                                                  |
| São Domingos mine | PAT_10-11_02/19  | 4.04 | 543.0                            | 656.1                           | 746.7                            | 1268                               | 439.3                             | 243                                                   |                                                  |
| Campanario mine   | C1_02/19         | 3.20 | 642.0                            | 361.8                           | 840.0                            | 1091.0                             | 379.5                             | 134.0                                                 |                                                  |
| Campanario mine   | C1_10/18         | 3.49 | 538.9                            | 305.1                           | 814.4                            | 1261.0                             | 573.1                             | 113.0                                                 |                                                  |
| São Domingos mine | PAT_10-11_10/18  | 4.27 | 624.5                            | 577.8                           | 778.9                            | 1488.0                             | 409.8                             | 214.0                                                 |                                                  |

**Table S1.** Physical-chemical parameters measured for the 121 mine-influenced waters, with the respective class and conversion factor (*f*) defined according to the HCA. EC – Electrical Conductivity; TDS – Gra = Total Dissolved Solids analyzed by gravimetry; TDS – est = Total Dissolved Solids estimated from EC; TDS\_Ac - Total Dissolved Solids estimated from Acidity. (continue)

| Sampling Location | Sample reference | pH   | TDS_est<br>(mg L <sup>-1</sup> ) | TDS_Ac<br>(mg L <sup>-1</sup> ) | TDS_Gra<br>(mg L <sup>-1</sup> ) | EC<br>( $\mu$ S cm <sup>-1</sup> ) | Sulfates<br>(mg L <sup>-1</sup> ) | Acidity<br>(mg L <sup>-1</sup> of CaCO <sub>3</sub> ) | Class and <i>f</i> <sub>median</sub>           |
|-------------------|------------------|------|----------------------------------|---------------------------------|----------------------------------|------------------------------------|-----------------------------------|-------------------------------------------------------|------------------------------------------------|
| Valdarcas mine    | V3_05/19         | 3.01 | 819.0                            | 1165.5                          | 1156.1                           | 1859.0                             | 793.0                             | 555.0                                                 | Blue class –<br>moderate MIW<br><i>f</i> = 2.1 |
| Valdarcas mine    | V3_03/19         | 2.91 | 792.0                            | 1291.5                          | 1563.9                           | 1895                               | 829.9                             | 615                                                   |                                                |
| Valdarcas mine    | V3_01/19         | 3.18 | 910.9                            | 1245.3                          | 1238.1                           | 1751.0                             | 836.0                             | 593.0                                                 |                                                |
| Valdarcas mine    | V3_04/19         | 2.83 | 810.0                            | 1192.8                          | 1099.4                           | 1754.0                             | 838.2                             | 568.0                                                 |                                                |
| Valdarcas mine    | V3_02/19         | 2.82 | 856.0                            | 1249.5                          | 1397.3                           | 1789.0                             | 800.5                             | 595.0                                                 |                                                |
| Valdarcas mine    | V4_11/18         | 3.22 | 719.2                            | 1270.5                          | 1096.1                           | 1793                               | 762.2                             | 605                                                   |                                                |
| Valdarcas mine    | V4_01/19         | 3.19 | 755.8                            | 1402.8                          | 1471.7                           | 1863.0                             | 896.5                             | 668.0                                                 |                                                |
| Valdarcas mine    | V4_02/19         | 3.20 | 779.0                            | 1417.5                          | 1591.7                           | 1940.0                             | 899.0                             | 675.0                                                 |                                                |
| Valdarcas mine    | V4_09/19         | 3.10 | 824.0                            | 1648.5                          | 1703.9                           | 1945.0                             | 932.9                             | 785.0                                                 |                                                |
| Valdarcas mine    | V4_04/19         | 2.83 | 843.0                            | 1570.8                          | 1596.9                           | 1998.0                             | 1039.8                            | 748.0                                                 |                                                |
| Valdarcas mine    | V4_03/19         | 3.10 | 849.0                            | 1596.0                          | 1977.2                           | 2077.0                             | 1042.0                            | 760.0                                                 |                                                |
| Valdarcas mine    | V4_08/19         | 3.10 | 824.0                            | 1738.8                          | 1715.0                           | 2041.0                             | 1011.0                            | 828.0                                                 |                                                |
| São Domingos mine | PAT_10_02/19     | 2.77 | 1009.0                           | 1417.5                          | 1520.0                           | 2059.0                             | 958.6                             | 675.0                                                 |                                                |
| São Domingos mine | PAT_5_4/17       | 2.63 | 1746.0                           | 2478.0                          | 2414.4                           | 2984.0                             | 1359.7                            | 1180.0                                                |                                                |
| São Domingos mine | PAT_3-0_6/19     | 2.70 | 1347.0                           | 1906.8                          | 1900.0                           | 3118.0                             | 1389.2                            | 908.0                                                 |                                                |
| São Domingos mine | PAT_5_02/19      | 2.29 | 1477.0                           | 2772.0                          | 2653.3                           | 3052.0                             | 1738.0                            | 1320.0                                                |                                                |
| São Domingos mine | PAT_5_12/16      | 2.68 | 2040.0                           | 3370.5                          | 3356.7                           | 3291.0                             | 1969.1                            | 1605.0                                                |                                                |
| Valdarcas mine    | V4_07/19         | 3.07 | 875.0                            | 1759.8                          | 1774.3                           | 2232.0                             | 1099.6                            | 838.0                                                 |                                                |
| Valdarcas mine    | V4_05/19         | 3.10 | 905.0                            | 1864.8                          | 1709.8                           | 2240.0                             | 1150.9                            | 888.0                                                 |                                                |
| São Domingos mine | PAT_9-10_02/19   | 2.80 | 867.0                            | 1833.3                          | 1760.0                           | 2402.0                             | 1220.8                            | 873.0                                                 |                                                |
| Valdarcas mine    | V4_06/19         | 3.30 | 877.0                            | 1822.8                          | 1812.8                           | 2315                               | 1168.7                            | 868                                                   |                                                |
| São Domingos mine | PAT_9-10_10/18   | 4.27 | 1159.0                           | 1690.5                          | 1503.9                           | 2607.0                             | 1128.3                            | 805.0                                                 |                                                |
| São Domingos mine | PAT_10_10/18     | 2.38 | 1165.0                           | 1680.0                          | 1552.2                           | 2579.0                             | 1121.6                            | 800.0                                                 |                                                |
| Valdarcas mine    | V4_10/18         | 3.39 | 896.8                            | 1770.3                          | 2148.8                           | 2500.0                             | 1092.8                            | 843.0                                                 |                                                |
| São Domingos mine | PAT_3-0_10/19    | 2.50 | 1345.0                           | 1402.8                          | 1488.9                           | 2755.0                             | 1027.9                            | 668.0                                                 |                                                |
| São Domingos mine | PAT_3-0_10/18    | 2.63 | 1208.0                           | 1291.5                          | 1540.0                           | 2668.0                             | 899.3                             | 615.0                                                 |                                                |
| São Domingos mine | PAT_3-0_02/19    | 2.21 | 1105.0                           | 1255.8                          | 1103.3                           | 2428                               | 946.2                             | 598                                                   |                                                |
| São Domingos mine | PAT_6_10/19      | 2.89 | 1349.0                           | 852.6                           | 2155.6                           | 2618                               | 1387                              | 406                                                   |                                                |

**Table S1.** Physical-chemical parameters measured for the 121 mine-influenced waters, with the respective class and conversion factor (f) defined according to the HCA. EC – Electrical Conductivity; TDS – Gra = Total Dissolved Solids analyzed by gravimetry; TDS – est = Total Dissolved Solids estimated from EC; TDS\_Ac - Total Dissolved Solids estimated from Acidity. (continue)

| Sampling Location | Sample reference | pH   | TDS_est<br>(mg L <sup>-1</sup> ) | TDS_Ac<br>(mg L <sup>-1</sup> ) | TDS_Gra<br>(mg L <sup>-1</sup> ) | EC<br>(μS cm <sup>-1</sup> ) | Sulfates<br>(mg L <sup>-1</sup> ) | Acidity<br>(mg L <sup>-1</sup> of CaCO <sub>3</sub> ) | Class and f <sub>median</sub>                |
|-------------------|------------------|------|----------------------------------|---------------------------------|----------------------------------|------------------------------|-----------------------------------|-------------------------------------------------------|----------------------------------------------|
| Campanario mine   | C6_10/19         | 4.69 | 1789.0                           | 5098.5                          | 3879.3                           | 3850.0                       | 3264.6                            | 1545.0                                                | Yellow class –<br>contaminated MIW<br>f= 3.3 |
| Campanario mine   | C5_10/19         | 4.18 | 1828.0                           | 5016.0                          | 4081.1                           | 3948.0                       | 3200.5                            | 1520.0                                                |                                              |
| Campanario mine   | C3_10/19         | 2.94 | 1962.0                           | 4999.5                          | 3716.7                           | 3974                         | 3041.2                            | 1515                                                  |                                              |
| Campanario mine   | C4_10/19         | 3.56 | 1965.0                           | 4976.4                          | 4001.1                           | 3928.0                       | 3003.5                            | 1508.0                                                |                                              |
| Campanario mine   | C5_06/19         | 3.64 | 1742.0                           | 5091.9                          | 4973.3                           | 4021                         | 2898.5                            | 1543                                                  |                                              |
| Campanario mine   | C2_10/18         | 2.76 | 1980.0                           | 4669.5                          | 4663.7                           | 4189.0                       | 2443.6                            | 1415.0                                                |                                              |
| Campanario mine   | C2_02/19         | 2.96 | 1964.0                           | 4488.0                          | 5369.2                           | 4080                         | 2574.9                            | 1360                                                  |                                              |
| Campanario mine   | C5_02/19         | 3.81 | 1765.0                           | 4983.0                          | 5445                             | 3910                         | 2674.6                            | 1510                                                  |                                              |
| Campanario mine   | C4_02/19         | 2.74 | 1848.0                           | 4950.0                          | 5523.3                           | 3919.0                       | 2676.7                            | 1500.0                                                |                                              |
| Campanario mine   | C6_02/19         | 4.29 | 1783.0                           | 5148.0                          | 4492.2                           | 3872                         | 2694.3                            | 1560                                                  |                                              |
| Campanario mine   | C3-4_10/18       | 3.05 | 1877.0                           | 4752.0                          | 5443.3                           | 3992.0                       | 2699.7                            | 1440.0                                                |                                              |
| São Domingos mine | PAT_9-10_6/19    | 2.73 | 1833.0                           | 5091.9                          | 3616                             | 4038                         | 2492.4                            | 1543                                                  |                                              |
| Campanario mine   | C3_10/18         | 2.95 | 1895.0                           | 4910.4                          | 4866.7                           | 3999                         | 2585.5                            | 1488                                                  |                                              |
| Campanario mine   | C6_10/18         | 4.69 | 1731.0                           | 4768.5                          | 5210.2                           | 3848.0                       | 2557.0                            | 1445.0                                                |                                              |
| Campanario mine   | C4_10/18         | 3.21 | 1823.0                           | 4785.0                          | 5603.3                           | 3953                         | 2361.9                            | 1450                                                  |                                              |
| Campanario mine   | C5_10/18         | 3.97 | 1755.0                           | 4851.0                          | 5758.9                           | 3902                         | 2343.3                            | 1470                                                  |                                              |
| Campanario mine   | C3_02/19         | 2.82 | 1857.0                           | 4917.0                          | 4931.1                           | 3884                         | 2255.3                            | 1490                                                  |                                              |

**Table S1.** Physical-chemical parameters measured for the 121 mine-influenced waters, with the respective class and conversion factor (*f*) defined according to the HCA. EC – Electrical Conductivity; TDS – Gra = Total Dissolved Solids analyzed by gravimetry; TDS – est = Total Dissolved Solids estimated from EC; TDS\_Ac - Total Dissolved Solids estimated from Acidity. (continue)

| Sampling Location | Sample reference | pH   | TDS_est<br>(mg L <sup>-1</sup> ) | TDS_Ac<br>(mg L <sup>-1</sup> ) | TDS_Gra<br>(mg L <sup>-1</sup> ) | EC<br>(μS cm <sup>-1</sup> ) | Sulfates<br>(mg L <sup>-1</sup> ) | Acidity<br>(mg L <sup>-1</sup> of CaCO <sub>3</sub> ) | Class and <i>f</i> <sub>median</sub>                     |
|-------------------|------------------|------|----------------------------------|---------------------------------|----------------------------------|------------------------------|-----------------------------------|-------------------------------------------------------|----------------------------------------------------------|
| São Domingos mine | PAT_5_10/18      | 2.33 | 1714.0                           | 4025.0                          | 3745.6                           | 3993.0                       | 2243.6                            | 1750.0                                                | Brown class – high<br>contaminated MIW<br><i>f</i> = 2.3 |
| São Domingos mine | PAT_5_9/21       | 2.50 | 4038.0                           | 4190.6                          | 4193.8                           | 3856.0                       | 2482.7                            | 1822.0                                                |                                                          |
| São Domingos mine | PAT_5_7/17       | 2.56 | 3940.0                           | 9901.5                          | 8181.1                           | 6330.0                       | 5152.4                            | 4305.0                                                |                                                          |
| São Domingos mine | PAT_5_2/18       | 3.06 | 2290.0                           | 5934.0                          | 4693.9                           | 4630.0                       | 2623.8                            | 2580.0                                                |                                                          |
| São Domingos mine | PAT_5_6/17       | 2.62 | 2800.0                           | 6129.5                          | 4943.3                           | 4593.0                       | 2797.0                            | 2665.0                                                |                                                          |
| São Domingos mine | PAT_S2_6/19      | 3.10 | 1598.0                           | 5296.9                          | 4899.3                           | 3960.0                       | 3041.7                            | 2303.0                                                |                                                          |
| Campanario mine   | C6_06/19         | 4.82 | 1680.0                           | 4795.5                          | 4948.9                           | 4061.0                       | 2956.1                            | 2085.0                                                |                                                          |
| São Domingos mine | PAT_7_sul_9/21   | 2.18 | 2737.0                           | 7902.8                          | 5323.9                           | 4930.0                       | 3665.6                            | 3436.0                                                |                                                          |
| Campanario mine   | C3_06/19         | 2.53 | 2476.0                           | 4795.5                          | 6381.1                           | 5495.0                       | 4354.3                            | 2085.0                                                |                                                          |
| Campanario mine   | C2_06/19         | 2.63 | 2387.0                           | 4082.5                          | 6372.2                           | 5399.0                       | 4259.1                            | 1775.0                                                |                                                          |
| Campanario mine   | C1_10/19         | 2.60 | 2250.0                           | 3341.9                          | 5168.3                           | 4565.0                       | 3962.4                            | 1453.0                                                |                                                          |
| Campanario mine   | C2_10/19         | 2.63 | 2130.0                           | 3231.5                          | 5133.3                           | 4423.0                       | 3727.6                            | 1405.0                                                |                                                          |
| Campanario mine   | C4_06/19         | 2.63 | 1965.0                           | 3979.0                          | 5381.1                           | 4388.0                       | 3487.3                            | 1730.0                                                |                                                          |
| São Domingos mine | PAT_10_6/19      | 2.68 | 2253.0                           | 3875.5                          | 4898.7                           | 5311.0                       | 3161.4                            | 1685.0                                                |                                                          |

**Table S1.** Physical-chemical parameters measured for the 121 mine-influenced waters, with the respective class and conversion factor (*f*) defined according to the HCA. EC – Electrical Conductivity; TDS – Gra = Total Dissolved Solids analyzed by gravimetry; TDS – est = Total Dissolved Solids estimated from EC; TDS\_Ac - Total Dissolved Solids estimated from Acidity. (continue)

| Sampling Location | Sample reference | pH   | TDS_est<br>(mg L <sup>-1</sup> ) | TDS_Ac<br>(mg L <sup>-1</sup> ) | TDS_Gra<br>(mg L <sup>-1</sup> ) | EC<br>(μS cm <sup>-1</sup> ) | Sulfates<br>(mg L <sup>-1</sup> ) | Acidity<br>(mg L <sup>-1</sup> of CaCO <sub>3</sub> ) | Class and <i>f</i> <sub>median</sub>                                  |
|-------------------|------------------|------|----------------------------------|---------------------------------|----------------------------------|------------------------------|-----------------------------------|-------------------------------------------------------|-----------------------------------------------------------------------|
| São Domingos mine | PAT_2_10/18      | 2.48 | 4101.0                           | 11455.0                         | 12588.9                          | 9298.0                       | 8825.8                            | 3950.0                                                | Dark green class –<br>very high<br>contaminated MIW<br><i>f</i> = 2.9 |
| São Domingos mine | PAT_5_10/19      | 2.16 | 4412.0                           | 23011.5                         | 16902.2                          | 9290.0                       | 10398.7                           | 7935.0                                                |                                                                       |
| São Domingos mine | PAT_2_8/17       | 2.39 | 4182.0                           | 11237.5                         | 11745.0                          | 8779.0                       | 6482.4                            | 3875.0                                                |                                                                       |
| São Domingos mine | PAT_2_9/17       | 2.39 | 3786.0                           | 11426.0                         | 11810.3                          | 8625.0                       | 6698.5                            | 3940.0                                                |                                                                       |
| São Domingos mine | PAT_2_7/17       | 2.87 | 5660.0                           | 12035.0                         | 11570.0                          | 8591.0                       | 6070.2                            | 4150.0                                                |                                                                       |
| São Domingos mine | PAT_2_10/16      | 2.42 | 5410.0                           | 12035.0                         | 12885.0                          | 8623.0                       | 6246.7                            | 4150.0                                                |                                                                       |
| São Domingos mine | PAT_2_11/16      | 2.50 | 5360.0                           | 11904.5                         | 11478.3                          | 8490.0                       | 5709.8                            | 4105.0                                                |                                                                       |
| São Domingos mine | PAT_2_5/17       | 2.82 | 4670.0                           | 10005.0                         | 10384.4                          | 8056.0                       | 5567.3                            | 3450.0                                                |                                                                       |
| São Domingos mine | PAT_2_4/17       | 3.04 | 4770.0                           | 9106.0                          | 10820.0                          | 7891.0                       | 5886.5                            | 3140.0                                                |                                                                       |
| São Domingos mine | PAT_2_12/16      | 2.56 | 4980.0                           | 10860.5                         | 11123.3                          | 8122.0                       | 4742.1                            | 3745.0                                                |                                                                       |
| São Domingos mine | PAT_2_6/17       | 2.96 | 5200.0                           | 10773.5                         | 11062.2                          | 8530.0                       | 5019.3                            | 3715.0                                                |                                                                       |
| São Domingos mine | PAT_9-10_9/21    | 2.00 | 4492.0                           | 13458.9                         | 8315.6                           | 9090.0                       | 5154.0                            | 4641.0                                                |                                                                       |
| São Domingos mine | PAT_5_8/17       | 2.09 | 3319.0                           | 17327.5                         | 10290.0                          | 7471.0                       | 5659.0                            | 5975.0                                                |                                                                       |
| São Domingos mine | PAT_5_6/19       | 2.37 | 3288.0                           | 16457.5                         | 11419.0                          | 7740.0                       | 6300.4                            | 5675.0                                                |                                                                       |
| São Domingos mine | PAT_5_9/17       | 2.10 | 3402.0                           | 19995.5                         | 11280.6                          | 7996.0                       | 6564.9                            | 6895.0                                                |                                                                       |
| São Domingos mine | PAT_5_10/16      | 2.33 | 3205.0                           | 14413.0                         | 9431.7                           | 6762.0                       | 6518.0                            | 4970.0                                                |                                                                       |
| São Domingos mine | PAT_5_7/17       | 2.56 | 3940.0                           | 12484.5                         | 8181.1                           | 6330.0                       | 5152.4                            | 4305.0                                                |                                                                       |
| Campanario mine   | C1_06/19         | 2.50 | 2820.0                           | 6032.0                          | 8121.9                           | 6438.0                       | 6710.2                            | 2080.0                                                |                                                                       |

**Table S1.** Physical-chemical parameters measured for the 121 mine-influenced waters, with the respective class and conversion factor (*f*) defined according to the HCA. EC – Electrical Conductivity; TDS – Gra = Total Dissolved Solids analyzed by gravimetry; TDS – est = Total Dissolved Solids estimated from EC; TDS\_Ac - Total Dissolved Solids estimated from Acidity. (continue)

| Sampling Location | Sample reference | pH   | TDS_est<br>(mg L <sup>-1</sup> ) | TDS_Ac<br>(mg L <sup>-1</sup> ) | TDS_Gra<br>(mg L <sup>-1</sup> ) | EC<br>(μS cm <sup>-1</sup> ) | Sulfates<br>(mg L <sup>-1</sup> ) | Acidity<br>(mg L <sup>-1</sup> of CaCO <sub>3</sub> ) | Class and <i>f</i> <sub>median</sub>                           |
|-------------------|------------------|------|----------------------------------|---------------------------------|----------------------------------|------------------------------|-----------------------------------|-------------------------------------------------------|----------------------------------------------------------------|
| São Domingos mine | PAT_7_2/18       | 2.05 | 13512.0                          | 117937.5                        | 120590.0                         | 21830.0                      | 80690.8                           | 78625.0                                               | Red class -<br>extremely<br>contaminated MIW<br><i>f</i> = 1.5 |
| São Domingos mine | PAT_7_02/19      | 1.32 | 13564.0                          | 117750.0                        | 125662.8                         | 27480.0                      | 87799.3                           | 78500.0                                               |                                                                |
| São Domingos mine | PAT_7_4/17       | 2.48 | 11900.0                          | 94968.7                         | 115571.7                         | 20940.0                      | 59101.8                           | 63312.5                                               |                                                                |
| São Domingos mine | PAT_7_10/18      | 0.91 | 20850.0                          | 205875.0                        | 207417.2                         | 43710.0                      | 146946.8                          | 137250.0                                              |                                                                |
| São Domingos mine | PAT_7_9/21       | 1.47 | 19660.0                          | 154050.0                        | 158706.4                         | 38000.0                      | 107962.0                          | 102700.0                                              |                                                                |
| São Domingos mine | PAT_7_5/17       | 1.26 | 17450.0                          | 323250.0                        | 392554.4                         | 27720.0                      | 190960.9                          | 215500.0                                              |                                                                |
| São Domingos mine | PAT_7_6/17       | 0.98 | 10730.0                          | 625875.0                        | 640085.6                         | 13740.0                      | 310213.2                          | 417250.0                                              |                                                                |
| São Domingos mine | PAT_7_8/17       | 0.44 | 8793.0                           | 643875.0                        | 611595.6                         | 16190.0                      | 410600.7                          | 429250.0                                              |                                                                |
